# Supplementary material for: The levels of urinary glycosaminoglycans of patients with attenuated and severe type of mucopolysaccharidosis II determined by liquid chromatography-tandem mass spectrometry
Source: PubMed Central journal article supplement (PMC4908047; doi:10.1016/j.ymgmr.2016.03.009), 2016-04-22
Supplement: mmc1.pdf [file mmc1.pdf]

### Supplementary Table 1

UPLC method for the quantitation and fragmentation study of HS, DS and CS in the urinary GAGs in humans.

---

|                         |                                                                                       |
|-------------------------|---------------------------------------------------------------------------------------|
| Column                  | Waters Atlantis T3 50 mm<br>Internal diameter: 2.1 mm<br>Particle diameter: 3 $\mu$ m |
| Column temperature      | 45 °C                                                                                 |
| Weak wash solvent       | MeOH/H <sub>2</sub> O                                                                 |
| Strong wash solvent     | MeOH/ACN/IPA/0.1 % formic acid in H <sub>2</sub> O                                    |
| Mobile phase A          | 0.1 % formic acid/5 mM ammonium acetate                                               |
| Mobile phase B          | 0.1 % formic acid in MeOH                                                             |
| Gradient (%B)           | 0 - 1.5 min: 1 %<br>1.5 - 5 min: 1 - 90 %<br>5 - 6 min: 90 %<br>6.01 - 8.0 min: 1%    |
| Flow rate               | 0.4 mL/min                                                                            |
| Injection volume        | 0.5 $\mu$ L                                                                           |
| Injection mode          | Direct injection                                                                      |
| Autosampler temperature | 4 °C                                                                                  |

---

**Supplementary Table 2**

Instrument parameters for the fragmentation study of HS, DS and CS in the urinary GAGs in humans using LC-MS/MS.

---

|                              |          |
|------------------------------|----------|
| Interface                    | ESI      |
| Polarity                     | Positive |
| Capillary voltage            | 4.5 kV   |
| Source temperature           | 250 °C   |
| Desolvation temperature      | 400 °C   |
| Flow rate of cone gas        | 50 L/hr  |
| Flow rate of desolvation gas | 800 L/hr |
| Analyzing mode               | MRM      |
| Scan time                    | 0.1 s    |
| Data format                  | Centroid |

---

**Supplementary Table 3**

Product ion, precursor ion and collision energy for the fragmentation study of HS, DS and CS in the urinary GAGs in humans using LC-MS/MS.

|    | Precursor ion<br>( <i>m/z</i> ) | Product ion<br>( <i>m/z</i> ) | Collision energy<br>(V) |
|----|---------------------------------|-------------------------------|-------------------------|
| HS | 384                             | 162                           | -16                     |
| DS | 426                             | 236                           | -10                     |
| CS | 426                             | 236                           | -10                     |

**Supplementary Table 4**

Limit of detection (LOD) for the GAG.

| Species | LOD ( $\mu\text{g/mL}$ ) |
|---------|--------------------------|
| HS      | 1.0                      |
| DS      | 1.0                      |
| CS      | 1.0                      |

<sup>a</sup>Limit of detection is defined as  $S/N=3$ .
